# Supplementary material
Source: publisher site journal article supplement (https://vertebrate-zoology.arphahub.com/article/70989/download/suppl/31/)
Supplement: Supplementary file 1

## Sheet: Appendix S1
Field number	Haplotype number	Name on tree	Species	Country	Locality	Latitude	Longitude	Genbank
441		Ab_441_Mali	Atelerix albiventris 1	Mali	Kayes	14.524	-9.544	MK510223
459		Ab_459_Mali	Atelerix albiventris 1	Mali	Kayes	14.504	-11.091	MK510224
986		Ab_986_Mali	Atelerix albiventris 1	Mali	Ségou	13.750	-5.152	MK510234
988		Ab_988_Mali	Atelerix albiventris 1	Mali	Ségou	13.483	-5.812	MK510235
9452		Ab_9452_Mali	Atelerix albiventris 1	Mali	Kayes	14.540	-11.866	MK510305
9454		Ab_9454_Mali	Atelerix albiventris 1	Mali	Kayes	14.565	-11.733	MK510306
9455		Ab_9455_Mali	Atelerix albiventris 1	Mali	Kayes	14.552	-11.699	MK510307
9479		Ab_9479_Mali	Atelerix albiventris 1	Mali	Kayes	14.279	-11.268	MK510308
9480		Ab_9480_Mali	Atelerix albiventris 1	Mali	Kayes	14.257	-11.262	MK510309
9481		Ab_9481_Mali	Atelerix albiventris 1	Mali	Kayes	14.253	-11.260	MK510310
9482		Ab_9482_Mali	Atelerix albiventris 1	Mali	Kayes	14.253	-11.260	MK510311
9558		Ab_9558_Mali	Atelerix albiventris 1	Mali	Kayes	14.697	-10.269	MK510312
3	A46	Aa_3_Algeria	Atelerix algirus	Algeria	Adrar3	27.760	-0.263	KU179779
4	A30	Aa_4_Algeria	Atelerix algirus	Algeria	Adrar4	28.386	-0.233	KU179780
5	A46	Aa_5_Algeria	Atelerix algirus	Algeria	Algiers1	36.662	2.949	KU179779
6	A30	Aa_6_Algeria	Atelerix algirus	Algeria	Algiers2	36.612	3.114	KU179780
9	A43	Aa_9_Algeria	Atelerix algirus	Algeria	Algiers5	36.704	2.908	KU179781
13	A16	Aa_13_Algeria	Atelerix algirus	Algeria	Batna1	35.641	5.982	KU179782
14	A16	Aa_14_Algeria	Atelerix algirus	Algeria	Batna2	35.524	6.000	KU179782
15	A53	Aa_15_Algeria	Atelerix algirus	Algeria	Batna3	35.620	6.250	KU179783
24	A20	Aa_24_Algeria	Atelerix algirus	Algeria	Biskara	34.704	5.401	KU179784
25	A46	Aa_25_Algeria	Atelerix algirus	Algeria	Blida1	36.555	3.132	KU179779
26	A20	Aa_26_Algeria	Atelerix algirus	Algeria	Blida2	36.526	3.073	KU179784
27	A43	Aa_27_Algeria	Atelerix algirus	Algeria	Blida3	36.610	3.228	KU179781
28	A46	Aa_28_Algeria	Atelerix algirus	Algeria	Blida4	36.534	2.995	KU179779
29	A43	Aa_29_Algeria	Atelerix algirus	Algeria	Blida5	36.572	3.163	KU179781
30	A43	Aa_30_Algeria	Atelerix algirus	Algeria	Blida6	36.559	3.152	KU179781
31	A52	Aa_31_Algeria	Atelerix algirus	Algeria	Blida7	36.424	2.875	KU179785
32	A43	Aa_32_Algeria	Atelerix algirus	Algeria	Blida8	36.580	3.264	KU179781
33	A38	Aa_33_Algeria	Atelerix algirus	Algeria	B-Bou, Arreridj	35.933	5.036	KU179786
34	A20	Aa_34_Algeria	Atelerix algirus	Algeria	Bouira	36.529	3.688	KU179784
35	A20	Aa_35_Algeria	Atelerix algirus	Algeria	Boumerdès1	36.744	3.713	KU179784
36	A30	Aa_36_Algeria	Atelerix algirus	Algeria	Boumerdès2	36.821	3.863	KU179780
37	A21	Aa_37_Algeria	Atelerix algirus	Algeria	Boumerdès3	36.761	3.463	KU179787
38	A20	Aa_38_Algeria	Atelerix algirus	Algeria	Boumerdès4	36.746	3.725	KU179784
39	A45	Aa_39_Algeria	Atelerix algirus	Algeria	Boumerdès5	36.740	3.720	KU179788
42	A20	Aa_42_Algeria	Atelerix algirus	Algeria	Djelfa1	35.446	2.907	KU179784
43	A43	Aa_43_Algeria	Atelerix algirus	Algeria	Djelfa2	34.660	3.255	KU179781
44	A28	Aa_44_Algeria	Atelerix algirus	Algeria	El-Oued1	33.975	5.942	KU179789
45	A29	Aa_45_Algeria	Atelerix algirus	Algeria	El-Oued2	33.368	6.872	KU179790
46	A29	Aa_46_Algeria	Atelerix algirus	Algeria	El-Oued3	33.316	6.898	KU179790
50	A33	Aa_50_Algeria	Atelerix algirus	Algeria	Khenchela	35.437	7.155	KU179791
51	A30	Aa_51_Algeria	Atelerix algirus	Algeria	Laghouat	32.928	3.263	KU179780
52	A50	Aa_52_Algeria	Atelerix algirus	Algeria	Médéa1	36.256	2.739	KU179792
53	A30	Aa_53_Algeria	Atelerix algirus	Algeria	Médéa2	36.216	3.107	KU179780
58	A16	Aa_58_Algeria	Atelerix algirus	Algeria	Ouargla2	33.078	6.059	KU179782
59	A17	Aa_59_Algeria	Atelerix algirus	Algeria	Sétif1	36.317	4.840	KU179793
60	A17	Aa_60_Algeria	Atelerix algirus	Algeria	Sétif2	36.314	4.839	KU179793
62	A46	Aa_62_Algeria	Atelerix algirus	Algeria	Tipaza1	36.583	2.116	KU179779
63	A20	Aa_63_Algeria	Atelerix algirus	Algeria	Tipaza2	36.707	2.855	KU179784
64	A46	Aa_64_Algeria	Atelerix algirus	Algeria	Tipaza3	36.681	2.877	KU179779
65	A20	Aa_65_Algeria	Atelerix algirus	Algeria	Tlemcen1	34.869	-1.344	KU179784
66	A20	Aa_66_Algeria	Atelerix algirus	Algeria	Tlemcen2	34.874	-1.351	KU179784
67	A20	Aa_67_Algeria	Atelerix algirus	Algeria	Tlemcen3	34.864	-1.369	KU179784
339	A31	Aa_339_Libya	Atelerix algirus	Libya	Murzuq	25.928	14.248	MK510219
717	A13	Aa_717_Morocco	Atelerix algirus	Morocco	Essaouira	31.590	-9.104	MK510226
779	A30	Aa_779_Morocco	Atelerix algirus	Morocco	Nador	35.102	-2.869	MK510228
810		Aa_810_Morocco	Atelerix algirus	Morocco	El Kelaa	31.782	-7.587	MK510230
848	A05	Aa_848_Morocco	Atelerix algirus	Morocco	Ifrane - Fes	33.552	-4.975	MK510231
905	A38	Aa_905_Algeria	Atelerix algirus	Algeria	Batna	35.225	5.708	MK510232
940	A02	Aa_940_Morocco	Atelerix algirus	Morocco	Kenitra	34.773	-5.515	MK510233
1020	A01	Aa_1020_Morocco	Atelerix algirus	Morocco	Kenitra	34.185	-5.582	MK510236
1054	A09	Aa_1054_Morocco	Atelerix algirus	Morocco	Marrakech	31.544	-8.002	MK510237
1076	A07	Aa_1076_Morocco	Atelerix algirus	Morocco	El Kelaa	31.873	-7.456	MK510238
1559	A16	Aa_1559_Tunisia	Atelerix algirus	Tunisia	Jendouba	36.457	8.623	MK510242
3827	A13	Aa_3827_Morocco	Atelerix algirus	Morocco	Tiznit	29.708	-9.755	MK510250
5643	A32	Aa_5643_Morocco	Atelerix algirus	Morocco	Ouarzazate	31.181	-7.458	MK510252
5664	A12	Aa_5664_Morocco	Atelerix algirus	Morocco	Beni Mellal	32.472	-5.992	MK510253
5665	A30	Aa_5665_Morocco	Atelerix algirus	Morocco	Khénifra	32.747	-5.722	MK510254
5666	A26	Aa_5666_Morocco	Atelerix algirus	Morocco	Khénifra	32.753	-5.089	MK510255
5667	A26	Aa_5667_Morocco	Atelerix algirus	Morocco	Khénifra	32.749	-5.031	MK510256
5668	A11	Aa_5668_Morocco	Atelerix algirus	Morocco	Khénifra	32.749	-5.031	MK510257
5669	A30	Aa_5669_Morocco	Atelerix algirus	Morocco	Khénifra	32.894	-4.999	MK510258
5683	A25	Aa_5683_Morocco	Atelerix algirus	Morocco	Tanger	35.368	-6.015	MK510259
5684	A10	Aa_5684_Morocco	Atelerix algirus	Morocco	Tanger	35.661	-5.951	MK510260
5709	A30	Aa_5709_Morocco	Atelerix algirus	Morocco	Tan-Tan	28.818	-10.373	MK510261
5716	A13	Aa_5716_Morocco	Atelerix algirus	Morocco	Tan-Tan	28.271	-11.564	MK510262
6815	A51	Aa_6815_Tunisia	Atelerix algirus	Tunisia	Jendouba	36.582	8.694	MK510274
6825	A16	Aa_6825_Tunisia	Atelerix algirus	Tunisia	Kasserine	35.100	8.737	MK510275
6830	A37	Aa_6830_Tunisia	Atelerix algirus	Tunisia	Kairouan	35.319	9.754	MK510276
6835	A22	Aa_6835_Tunisia	Atelerix algirus	Tunisia	Zaghouan	36.183	10.051	MK510277
6845	A43	Aa_6845_Algeria	Atelerix algirus	Algeria	Tlemcen	35.182	-1.647	MK510278
6860	A20	Aa_6860_Morocco	Atelerix algirus	Morocco	Figuig	32.595	-1.941	MK510279
6863	A04	Aa_6863_Morocco	Atelerix algirus	Morocco	Meknes	33.621	-5.080	MK510280
6864	A06	Aa_6864_Morocco	Atelerix algirus	Morocco	Fes	33.623	-4.868	MK510281
6866	A30	Aa_6866_Morocco	Atelerix algirus	Morocco	Al Hoceima	34.973	-4.411	MK510282
6867	A30	Aa_6867_Morocco	Atelerix algirus	Morocco	Al Hoceima	34.966	-4.336	MK510283
6868	A08	Aa_6868_Morocco	Atelerix algirus	Morocco	Al Hoceima	34.948	-4.333	MK510284
6873	A07	Aa_6873_Morocco	Atelerix algirus	Morocco	Nador	34.976	-3.347	MK510285
6875	A15	Aa_6875_Morocco	Atelerix algirus	Morocco	Oujda	34.868	-2.452	MK510286
6878	A48	Aa_6878_Morocco	Atelerix algirus	Morocco	Oujda	34.509	-2.050	MK510287
6888	A20	Aa_6888_Morocco	Atelerix algirus	Morocco	Oujda	34.738	-2.375	MK510288
6890	A15	Aa_6890_Morocco	Atelerix algirus	Morocco	Oujda	34.738	-2.375	MK510289
6899	A30	Aa_6899_Morocco	Atelerix algirus	Morocco	Nador	35.075	-3.249	MK510290
6900	A30	Aa_6900_Morocco	Atelerix algirus	Morocco	Nador	35.075	-3.253	MK510291
6919	A03	Aa_6919_Morocco	Atelerix algirus	Morocco	Rabat	33.902	-6.825	MK510292
6970	A20	Aa_6970_Morocco	Atelerix algirus	Morocco	Khénifra	32.751	-5.084	MK510293
7114	A30	Aa_7114_Morocco	Atelerix algirus	Morocco	Figuig	32.967	-2.029	MK510294
7119	A20	Aa_7119_Morocco	Atelerix algirus	Morocco	Figuig	33.038	-2.003	MK510295
7120	A43	Aa_7120_Morocco	Atelerix algirus	Morocco	Tan-Tan	28.792	-10.42	MK510296
7923	A01	Aa_7923_Morocco	Atelerix algirus	Morocco	Tétouan	35.228	-6.099	MK510298
7924	A01	Aa_7924_Morocco	Atelerix algirus	Morocco	Meknes	33.245	-5.071	MK510299
8071		Aa_8071_Morocco	Atelerix algirus	Morocco	Tan-Tan	28.093	-11.348	MK510300
8457	A09	Aa_8457_Morocco	Atelerix algirus	Morocco	Safi	31.974	-9.376	MK510303
8586	A12	Aa_8586_Morocco	Atelerix algirus	Morocco	Azilal	32.258	-6.105	MK510304
10146	A44	Aa_10146_Morocco	Atelerix algirus	Morocco	Nador	34.867	-3.386	MK510313
10147	A30	Aa_10147_Morocco	Atelerix algirus	Morocco	Nador	34.824	-3.407	MK510314
10148	A09	Aa_10148_Morocco	Atelerix algirus	Morocco	Nador	34.706	-3.500	MK510315
10172	A43	Aa_10172_Morocco	Atelerix algirus	Morocco	Taza	34.285	-3.173	MK510316
10193	A46	Aa_10193_Morocco	Atelerix algirus	Morocco	Oujda	34.525	-1.912	MK510317
10194	A48	Aa_10194_Morocco	Atelerix algirus	Morocco	Oujda	34.443	-2.036	MK510318
10062606	A09	Aa_10062606_Canary Islands	Atelerix algirus	Canary Islands	Lanzarote	29.000	-13.520	OL692505
10101601	A09	Aa_10101601_Canary Islands	Atelerix algirus	Canary Islands	Fuerteventura (La Oliva)	28.620	-13.930	OL692506
10101602	A09	Aa_10101602_Canary Islands	Atelerix algirus	Canary Islands	Fuerteventura (La Oliva)	28.620	-13.930	OL692507
18072001	A39	Aa_18072001_Balearic Islands	Atelerix algirus	Balearic Islands	Minorca Island ( S'Albufera des Grau )	39.930	4.250	OL692508
23VI2010	A18	Aa_23VI2010_Tunisia	Atelerix algirus	Tunisia	Sfax	34.760	10.790	OL692499
C01	A20	Aa_C01_Tunisia	Atelerix algirus	Tunisia	Bouhedma. Sidi Bouzid	34.464	9.642	OL692519
C02	A34	Aa_C02_Tunisia	Atelerix algirus	Tunisia	Boulaaba. Kassrine	35.273	8.746	OL692520
C03	A58	Aa_C03_Tunisia	Atelerix algirus	Tunisia	Kessra. Seliana	35.811	9.355	OL692521
C04	A42	Aa_C04_Tunisia	Atelerix algirus	Tunisia	Rouhia. Seliana	35.632	9.199	OL692522
C05	A57	Aa_C05_Tunisia	Atelerix algirus	Tunisia	Hassi Elfrid. Kessrine	34.823	8.808	OL692523
C06	A34	Aa_C06_Tunisia	Atelerix algirus	Tunisia	Majel Belaabes. Kassrine	34.724	8.641	OL692524
C07	A57	Aa_C07_Tunisia	Atelerix algirus	Tunisia	Feriana. Kassrine	34.940	8.623	OL692525
C08	A57	Aa_C08_Tunisia	Atelerix algirus	Tunisia	Khmouda. Kassrine	35.333	8.749	OL692526
C09	A57	Aa_C09_Tunisia	Atelerix algirus	Tunisia	Majel Belaabes. Kassrine	34.730	8.442	OL692527
C10	A34	Aa_C10_Tunisia	Atelerix algirus	Tunisia	Feriana. Kassrine	34.924	8.496	OL692528
C11	A57	Aa_C11_Tunisia	Atelerix algirus	Tunisia	Thala. Kassrine	35.586	8.743	OL692529
C12	A20	Aa_C12_Tunisia	Atelerix algirus	Tunisia	Sebikha. Quarouan	35.931	9.937	OL692530
C13	A31	Aa_C13_Tunisia	Atelerix algirus	Tunisia	Nassralah. Quarouan	35.357	9.857	OL692531
C14	A31	Aa_C14_Tunisia	Atelerix algirus	Tunisia	Sebikha. Quarouan	35.961	10.091	OL692532
C15	A31	Aa_C15_Tunisia	Atelerix algirus	Tunisia	Sousse	35.814	10.532	OL692533
C16	A31	Aa_C16_Tunisia	Atelerix algirus	Tunisia	Sebikha. Quarouan	35.925	10.029	OL692534
C17	A36	Aa_C17_Tunisia	Atelerix algirus	Tunisia	Sfax	34.739	10.682	OL692535
C19	A36	Aa_C19_Tunisia	Atelerix algirus	Tunisia	Bir Ali Benkhlifa. Sfax	34.791	10.221	OL692536
C20	A56	Aa_C20_Tunisia	Atelerix algirus	Tunisia	Karker. Sousse	35.444	10.653	OL692537
C21	A35	Aa_C21_Tunisia	Atelerix algirus	Tunisia	El Chrarda. Mahdia	35.101	10.025	OL692538
C22	A16	Aa_C22_Tunisia	Atelerix algirus	Tunisia	Rgueb. Sidi Bouzid	34.835	9.7697	OL692539
C23	A35	Aa_C23_Tunisia	Atelerix algirus	Tunisia	Mahdia	35.510	11.026	OL692540
C24	A22	Aa_C24_Tunisia	Atelerix algirus	Tunisia	Limaya. Sfax	35.026	10.162	OL692541
C25	A16	Aa_C25_Tunisia	Atelerix algirus	Tunisia	Hibra. Mahdia	35.175	10.220	OL692542
C26	A47	Aa_C26_Tunisia	Atelerix algirus	Tunisia	Hibra. Mahdia	35.162	10.241	OL692543
C27	A20	Aa_C27_Tunisia	Atelerix algirus	Tunisia	Hibra. Mahdia	35.114	10.136	OL692544
C28	A54	Aa_C28_Tunisia	Atelerix algirus	Tunisia	El Hancha. Mahdia	35.151	10.719	OL692545
C29	A31	Aa_C29_Tunisia	Atelerix algirus	Tunisia	Kssour Saf. Mahdia	35.391	11.023	OL692546
C30	A16	Aa_C30_Tunisia	Atelerix algirus	Tunisia	El Jam. Mahdia	35.299	10.753	OL692547
C31	A49	Aa_C31_Tunisia	Atelerix algirus	Tunisia	Jammel. Mestir	35.638	10.729	OL692548
C32	A47	Aa_C32_Tunisia	Atelerix algirus	Tunisia	Manzel Fersi. Mestir	35.545	10.879	OL692549
C33	A31	Aa_C33_Tunisia	Atelerix algirus	Tunisia	Metlaoui. Gafsa	34.321	8.368	OL692550
H05	A30	Aa_H05_Algeria	Atelerix algirus	Algeria	M'sila, Reserve Naturelle de Mergueb	35.646	4.015	OL692551
H10	A46	Aa_H10_Algeria	Atelerix algirus	Algeria	M'sila, Diss	35.331	4.148	OL692552
H17	A30	Aa_H17_Algeria	Atelerix algirus	Algeria	M'sila, Benserour	35.037	4.572	OL692553
H19	A46	Aa_H19_Algeria	Atelerix algirus	Algeria	Bordj Bouarreridj, Bordj Laghdir	35.896	4.884	OL692554
H20	A47	Aa_H20_Algeria	Atelerix algirus	Algeria	M'sila, M'cif	35.316	4.795	OL692555
H21	A20	Aa_H21_Algeria	Atelerix algirus	Algeria	Bordj Bouarreridj, Bellimor	35.982	4.884	OL692556
H22	A46	Aa_H22_Algeria	Atelerix algirus	Algeria	Bordj Bouarreridj, Bellimor	35.982	4.884	OL692557
H28	A43	Aa_H28_Algeria	Atelerix algirus	Algeria	M'sila, Selmane	35.686	4.762	OL692558
H31	A27	Aa_H31_Algeria	Atelerix algirus	Algeria	M'sila, Ouanougha	35.984	4.213	OL692559
H36	A30	Aa_H36_Algeria	Atelerix algirus	Algeria	M'sila, Guerf	35.953	4.261	OL692560
H44	A46	Aa_H44_Algeria	Atelerix algirus	Algeria	M'sila, Selmane	35.681	4.759	OL692561
H52	A24	Aa_H52_Algeria	Atelerix algirus	Algeria	Sétif, near Zenadia forest	36.208	5.402	OL692562
H53	A46	Aa_H53_Algeria	Atelerix algirus	Algeria	Sétif, Boutaleb	35.653	5.316	OL692563
H60	A46	Aa_H60_Algeria	Atelerix algirus	Algeria	M'sila, boukhmissa	35.777	4.547	OL692564
H61	A20	Aa_H61_Algeria	Atelerix algirus	Algeria	Bordj Bouarreridj, Mansoura	36.134	4.409	OL692565
H64	A20	Aa_H64_Algeria	Atelerix algirus	Algeria	Bordj Bouarreridj, Hammadia	35.977	4.743	OL692566
H66	A37	Aa_H66_Algeria	Atelerix algirus	Algeria	Bejaïa, Chemini –Djenane	36.590	4.612	OL692567
MA676	A13	Aa_MA676_Morocco	Atelerix algirus	Morocco	Merja Zerga	34.79	-6.241	OL692568
MA734	A30	Aa_MA734_Morocco	Atelerix algirus	Morocco	Merja Zerga	34.79	-6.241	OL692569
Montuïri	A39	Aa_Montuiri_Balearic Islands	Atelerix algirus	Balearic Islands	Mallorca Island, Montuïri	39.567	2.982	OL692570
MZB 2000-0110-T	A39	Aa_20000110_Spain	Atelerix algirus	Spain	Lleida	41.620	0.631	OL692509
MZB 2000-0112-T	A39	Aa_20000112_Spain	Atelerix algirus	Spain	Lleida	41.620	0.631	OL692510
MZB 2000-0113-T	A40	Aa_20000113_Spain	Atelerix algirus	Spain	Lleida	41.620	0.631	OL692511
MZB 2000-0116-T	A39	Aa_20000116_Spain	Atelerix algirus	Spain	Lleida	41.620	0.631	OL692512
MZB 2003-0081-T	A39	Aa_20030081_Spain	Atelerix algirus	Spain	Vallfogona de Balaguer	41.752	0.815	OL692513
MZB 2009-0037-T	A39	Aa_20090037_Spain	Atelerix algirus	Spain	Lleida	41.620	0.631	OL692514
MZB 2010-0161-T	A41	Aa_20100161_Spain	Atelerix algirus	Spain	Lleida	41.620	0.631	OL692515
MZB 2011-1000-T	A39	Aa_20111000_Spain	Atelerix algirus	Spain	Lleida	41.620	0.631	OL692516
MZB 2013-2661-T	A39	Aa_20132661_Spain	Atelerix algirus	Spain	Riudoms	41.138	1.051	OL692517
MZB 2016-2975-T	A40	Aa_20162975_Spain	Atelerix algirus	Spain	Vendrell, el	41.220	1.535	OL692518
MZB 96-0456-T	A40	Aa_960456_Spain	Atelerix algirus	Spain	Bell-Lloc d'Urgell	41.630	0.779	OL692500
MZB 96-0458-T	A39	Aa_960458_Spain	Atelerix algirus	Spain	Lleida	41.620	0.631	OL692501
MZB 97-0228-T	A39	Aa_970228_Spain	Atelerix algirus	Spain	Lleida	41.620	0.631	OL692502
MZB 97-0558-T	A39	Aa_970558_Spain	Atelerix algirus	Spain	Omellons, els	41.501	0.959	OL692503
MZB 98-0262-T	A41	Aa_980262_Spain	Atelerix algirus	Spain	Almacelles	41.727	0.441	OL692504
N01	A36	Aa_N01_Tunisia	Atelerix algirus	Tunisia	Carthage. Tunis	36.856	10.321	OL692571
N02	A16	Aa_N02_Tunisia	Atelerix algirus	Tunisia	Hammamet. Nabeul	36.446	10.617	OL692572
N03	A19	Aa_N03_Tunisia	Atelerix algirus	Tunisia	Manzel Horr. Nabeul	36.735	10.953	OL692573
N04	A35	Aa_N04_Tunisia	Atelerix algirus	Tunisia	Manzel Horr. Nabeul	36.727	10.936	OL692574
N05	A55	Aa_N05_Tunisia	Atelerix algirus	Tunisia	Tibar. Beja	36.531	9.1160	OL692575
N06	A22	Aa_N06_Tunisia	Atelerix algirus	Tunisia	Ghardimaou. Jandouba	36.431	8.4430	OL692576
N07	A34	Aa_N07_Tunisia	Atelerix algirus	Tunisia	Borj Touil. Ariana	36.942	10.136	OL692577
N08	A34	Aa_N08_Tunisia	Atelerix algirus	Tunisia	Seress. Seliana	36.023	8.977	OL692578
N09	A34	Aa_N09_Tunisia	Atelerix algirus	Tunisia	Bir Drassen. Nabeul	36.644	10.701	OL692579
N10	A34	Aa_N10_Tunisia	Atelerix algirus	Tunisia	Oued Chiba. Nabeul	36.697	10.812	OL692580
N11	A47	Aa_N11_Tunisia	Atelerix algirus	Tunisia	Fahes. Zaghouan	36.393	9.873	OL692581
N12	A34	Aa_N12_Tunisia	Atelerix algirus	Tunisia	Rtiba. Nabeul	36.887	10.740	OL692582
N13	A56	Aa_N13_Tunisia	Atelerix algirus	Tunisia	Tajerouine. Kef	35.997	8.612	OL692583
N14	A31	Aa_N14_Tunisia	Atelerix algirus	Tunisia	Tastour. Beja	36.584	9.362	OL692584
N15	A56	Aa_N15_Tunisia	Atelerix algirus	Tunisia	Seliana	36.009	9.456	OL692585
N16	A35	Aa_N16_Tunisia	Atelerix algirus	Tunisia	El Krib. Beja	36.307	9.138	OL692586
N17	A35	Aa_N17_Tunisia	Atelerix algirus	Tunisia	Tajerouine. Kef	35.993	8.495	OL692587
N18a	A58	Aa_N18a_Tunisia	Atelerix algirus	Tunisia	Tajerouine. Kef	35.892	8.563	OL692588
N19	A20	Aa_N19_Tunisia	Atelerix algirus	Tunisia	Oued Zarga. Beja	36.687	9.459	OL692589
N20	A31	Aa_N20_Tunisia	Atelerix algirus	Tunisia	Tebourba. Manouba	36.862	9.755	OL692590
N21	A49	Aa_N21_Tunisia	Atelerix algirus	Tunisia	Sidi Thabet. Ariana	36.889	10.061	OL692591
N22	A23	Aa_N22_Tunisia	Atelerix algirus	Tunisia	Edkhila. Manouba	36.883	9.691	OL692592
N23	A47	Aa_N23_Tunisia	Atelerix algirus	Tunisia	Sidi Thabet. Aariana	36.916	10.030	OL692593
S01	A31	Aa_S01_Tunisia	Atelerix algirus	Tunisia	Medenine	33.366	10.496	OL692594
S02	A42	Aa_S02_Tunisia	Atelerix algirus	Tunisia	Bir Lahmer. Tataouine	33.207	10.442	OL692595
S03	A31	Aa_S03_Tunisia	Atelerix algirus	Tunisia	Ben Guerdan. Medenine	33.177	11.180	OL692596
S04	A14	Aa_S04_Tunisia	Atelerix algirus	Tunisia	Kssar Ouled Oun. Medenine	32.872	10.909	OL692597
S05	A14	Aa_S05_Tunisia	Atelerix algirus	Tunisia	Elsed. Tataouine	33.179	10.478	OL692598
S06	A14	Aa_S06_Tunisia	Atelerix algirus	Tunisia	Koutine. Medenine	33.452	10.361	OL692599
S07	A31	Aa_S07_Tunisia	Atelerix algirus	Tunisia	Boughrara. Medenine	33.562	10.640	OL692600
S08	A42	Aa_S08_Tunisia	Atelerix algirus	Tunisia	Oued Dekouk. Tataouine	32.654	10.258	OL692601
S09	A31	Aa_S09_Tunisia	Atelerix algirus	Tunisia	Tataouine Neuve	32.900	10.458	OL692602
S10	A31	Aa_S10_Tunisia	Atelerix algirus	Tunisia	Zahra. Tataouine	32.825	10.590	OL692603
S11	A14	Aa_S11_Tunisia	Atelerix algirus	Tunisia	Matmata. Medenine	33.575	9.911	OL692604
S12	A42	Aa_S12_Tunisia	Atelerix algirus	Tunisia	Gabes	33.846	10.141	OL692605
398		As_398_Niger	Atelerix albiventris 2	Niger	Tahoua	14.829	5.305	MK510220
404		As_404_Niger	Atelerix albiventris 2	Niger	Dosso	13.009	3.612	MK510221
406		As_406_Niger	Atelerix albiventris 2	Niger	Tahoua	13.097	2.970	MK510222
6610		As_6610_Niger	Atelerix albiventris 2	Niger	Niamey	13.420	2.295	MK510268
6623		As_6623_Niger	Atelerix albiventris 2	Niger	Zinder	13.707	9.373	MK510269
6647		As_6647_Niger	Atelerix albiventris 2	Niger	Diffa	13.340	12.614	MK510270
6651		As_6651_Niger	Atelerix albiventris 2	Niger	Diffa	13.511	12.823	MK510271
6781		As_6781_Niger	Atelerix albiventris 2	Niger	Zinder	14.161	9.734	MK510272
6791		As_6791_Niger	Atelerix albiventris 2	Niger	Maradi	13.679	6.512	MK510273
1468		Ec_1468_Turkey	Erinaceus concolor	Turkey	Firat	38.211	35.865	MK510241
2823		Ec_2823_Armenia	Erinaceus concolor	Armenia	Caucaso	39.000	46.500	MK510246
720		Ee_720_Portugal	Erinaceus europaeus	Portugal	Douro Litoral	41.333	-8.66	MK510227
782		Ee_782_Portugal	Erinaceus europaeus	Portugal	Minho	41.927	-8.58	MK510229
1142		Ee_1142_Spain	Erinaceus europaeus	Spain	Castilla-León	42.745	-3.80	MK510239
2801		Ee_2801_Portugal	Erinaceus europaeus	Portugal	Alentejo	37.922	-7.50	MK510244
2805		Ee_2805_Portugal	Erinaceus europaeus	Portugal	Algarve	37.290	-8.59	MK510245
3848		Ee_3848_Spain	Erinaceus europaeus	Spain	Alicante	38.083	-0.83	MK510251
2824		Er_2824_Greece	Erinaceus roumanicus	Greece	Kedriki Makedhonía	41.237	23.086	MK510247
2825		Er_2825_Greece	Erinaceus roumanicus	Greece	Kedriki Makedhonía	41.258	23.095	MK510248
2827		Er_2827_Greece	Erinaceus roumanicus	Greece	Olympus	40.220	22.540	MK510249
1	P02	Pa_1_Algeria	Paraechinus aethiopicus	Algeria	Adrar1	26.727	0.170	KU179768
2	P02	Pa_2_Algeria	Paraechinus aethiopicus	Algeria	Adrar2	28.596	0.040	KU179768
16	P05	Pa_16_Algeria	Paraechinus aethiopicus	Algeria	Béchar1	30.122	-2.171	KU179769
17	P08	Pa_17_Algeria	Paraechinus aethiopicus	Algeria	Béchar2	30.119	-2.172	KU179770
18	P07	Pa_18_Algeria	Paraechinus aethiopicus	Algeria	Béchar3	30.108	-2.169	KU179771
19	P15	Pa_19_Algeria	Paraechinus aethiopicus	Algeria	Béchar4	30.335	-2.288	KU179772
20	P13	Pa_20_Algeria	Paraechinus aethiopicus	Algeria	Béchar5	29.908	-2.285	KU179773
21	P13	Pa_21_Algeria	Paraechinus aethiopicus	Algeria	Béchar6	30.034	-1.881	KU179773
22	P18	Pa_22_Algeria	Paraechinus aethiopicus	Algeria	Béchar7	31.609	-2.247	KU179774
47	P05	Pa_47_Algeria	Paraechinus aethiopicus	Algeria	Ghardaïa1	30.596	2.883	KU179769
48	P06	Pa_48_Algeria	Paraechinus aethiopicus	Algeria	Ghardaïa2	30.547	2.915	KU179775
49	P16	Pa_49_Algeria	Paraechinus aethiopicus	Algeria	Ghardaïa3	30.568	2.878	KU179776
57	P09	Pa_57_Algeria	Paraechinus aethiopicus	Algeria	Ouargla1	33.060	6.051	KU179777
61	P17	Pa_61_Algeria	Paraechinus aethiopicus	Algeria	Tamanrasset	27.184	2.475	KU179778
143	P11	Pa_143_Morocco	Paraechinus aethiopicus	Morocco	Dakhla	24.846	-14.845	MK510217
323	P19	Pa_323_Libya	Paraechinus aethiopicus	Libya	Ghadamis	32.298	11.752	MK510218
479	P11	Pa_479_Senegal	Paraechinus aethiopicus	Senegal	Saint-Louis	16.349	-14.248	MK510225
1311	P15	Pa_1311_Mauritania	Paraechinus aethiopicus	Mauritania	Brakna	16.302	-13.879	MK510240
2207	P12	Pa_2207_Mauritania	Paraechinus aethiopicus	Mauritania	Hodh El Gharbi	16.382	-9.564	MK510243
5732	P13	Pa_5732_Morocco	Paraechinus aethiopicus	Morocco	Rio de Oro	23.117	-16.070	MK510263
5914	P11	Pa_5914_Mauritania	Paraechinus aethiopicus	Mauritania	Adrar	20.269	-13.230	MK510264
5916	P13	Pa_5916_Mauritania	Paraechinus aethiopicus	Mauritania	Adrar	20.127	-13.691	MK510265
6311	P11	Pa_6311_Mauritania	Paraechinus aethiopicus	Mauritania	Dakhlet-Nouâdhibou	19.567	-16.383	MK510266
7166	P11	Pa_7166_Morocco	Paraechinus aethiopicus	Morocco	Tata	29.125	-8.393	MK510297
8337	P05	Pa_8337_Morocco	Paraechinus aethiopicus	Morocco	Figuig	32.541	-1.142	MK510301
8348	P14	Pa_8348_Morocco	Paraechinus aethiopicus	Morocco	Figuig	32.159	-2.732	MK510302
H01	P02	Pa_H01_Algeria	Paraechinus aethiopicus	Algeria	M'sila, Reserve Naturelle de Mergueb	35.626	3.988	OL692606
H02	P02	Pa_H02_Algeria	Paraechinus aethiopicus	Algeria	M'sila, Reserve Naturelle de Mergueb	35.611	3.906	OL692607
H03	P02	Pa_H03_Algeria	Paraechinus aethiopicus	Algeria	M'sila, Reserve Naturelle de Mergueb	35.646	3.948	OL692608
H06	P05	Pa_H06_Algeria	Paraechinus aethiopicus	Algeria	M'sila, Reserve Naturelle de Mergueb	35.624	3.974	OL692609
H07	P09	Pa_H07_Algeria	Paraechinus aethiopicus	Algeria	M'sila, Reserve Naturelle de Mergueb	35.599	3.886	OL692610
H11	P02	Pa_H11_Algeria	Paraechinus aethiopicus	Algeria	M'sila, Ouled Mansour	35.730	4.396	OL692611
H14	P02	Pa_H14_Algeria	Paraechinus aethiopicus	Algeria	M'sila, Draa Berrabbah	35.696	4.441	OL692612
H15	P02	Pa_H15_Algeria	Paraechinus aethiopicus	Algeria	M'sila, Reserve Naturelle de Mergueb	35.600	3.973	OL692613
H29	P02	Pa_H29_Algeria	Paraechinus aethiopicus	Algeria	M'sila, Zerarka	35.641	4.272	OL692614
H39	P03	Pa_H39_Algeria	Paraechinus aethiopicus	Algeria	M'sila, Ouled Mansour (qariet Boulsen)	35.748	4.372	OL692615
H40	P02	Pa_H40_Algeria	Paraechinus aethiopicus	Algeria	M'sila, Guerfala (Souamaa)	35.581	4.727	OL692616
H43	P02	Aa_H43_Algeria	Paraechinus aethiopicus	Algeria	M'sila, Tamssa (Boussaada)	35.178	3.924	OL692617
H48	P09	Pa_H48_Algeria	Paraechinus aethiopicus	Algeria	M'sila, Ouled Derradj	35.685	4.775	OL692618
H51	P02	Pa_H51_Algeria	Paraechinus aethiopicus	Algeria	Pôle universitaire de M'sila	35.743	4.548	OL692619
H67	P02	Pa_H67_Algeria	Paraechinus aethiopicus	Algeria	M'sila, Ouled Mansour	35.730	4.397	OL692620
P01	P04	Pa_P01_Tunisia	Paraechinus aethiopicus	Tunisia	Bir Lahmer. Tataouine	33.207	10.442	OL692621
P03	P05	Pa_P03_Tunisia	Paraechinus aethiopicus	Tunisia	Ghoumrassen. Tataouine	33.073	10.251	OL692622
P05	P10	Pa_P05_Tunisia	Paraechinus aethiopicus	Tunisia	Elsed. Tataouine	33.197	10.488	OL692623
P06	P15	Pa_P06_Tunisia	Paraechinus aethiopicus	Tunisia	Bir Lahmer. Tataouine	33.185	10.560	OL692624
